1 **POIROT: A powerful test for parent-of-origin effects in unrelated samples leveraging**  
2 **multiple phenotypes**

3

4 **S. Taylor Head<sup>1</sup>, Elizabeth J. Leslie<sup>2</sup>, David J. Cutler<sup>2</sup>, Michael P. Epstein<sup>2\*</sup>**

5

6 <sup>1</sup>Department of Biostatistics and Bioinformatics, Rollins School of Public Health, Emory

7 University, Atlanta, GA 30322, USA

8 <sup>2</sup>Department of Human Genetics, Emory University School of Medicine, Atlanta, GA 30322,

9 USA

10

11 \*Corresponding author: [mpepste@emory.edu](mailto:mpepste@emory.edu)

12

13 **ABSTRACT**

14 **Motivation:** There is widespread interest in identifying genetic variants that exhibit parent-of-  
15 origin effects (POEs) wherein the effect of an allele on phenotype expression depends on its  
16 parental origin. POEs can arise from different phenomena including genomic imprinting and  
17 have been documented for many complex traits. Traditional tests for POEs require family data to  
18 determine parental origins of transmitted alleles. As most genome-wide association studies  
19 (GWAS) instead sample unrelated individuals (where allelic parental origin is unknown), the  
20 study of POEs in such datasets requires sophisticated statistical methods that exploit genetic  
21 patterns we anticipate observing when POEs exist. We propose a method to improve discovery  
22 of POE variants in large-scale GWAS samples that leverages potential pleiotropy among  
23 multiple correlated traits often collected in such studies. Our method compares the phenotypic  
24 covariance matrix of heterozygotes to homozygotes based on a Robust Omnibus Test. We refer  
25 to our method as the Parent of Origin Inference using Robust Omnibus Test (POIROT) of  
26 multiple quantitative traits.

27 **Results:** Through simulation studies, we compared POIROT to a competing univariate variance-  
28 based method which considers separate analysis of each phenotype. We observed POIROT to be  
29 well-calibrated with improved power to detect POEs compared to univariate methods. POIROT  
30 is robust to non-normality of phenotypes and can easily adjust for population stratification and  
31 other confounders. Finally, we applied POIROT to a GWAS of quantitative anthropometric  
32 measures at birth. We identified two loci of suggestive significance for follow-up investigation.

33

34

35

## 36 **1 INTRODUCTION**

37 Most genome-wide association studies (GWAS) implicitly assume the magnitude and direction  
38 of effect of a genetic variant on expression of a phenotype is independent of whether the variant  
39 was maternally or paternally inherited. However, there exists a distinct class of genetic variants  
40 for which this assumption is violated. Such variants harbor a parent-of-origin effect (POE)  
41 wherein the effect of an allele on a trait depends on whether it was transmitted from the mother  
42 or the father (Lawson *et al.*, 2013). A substantial proportion of the variation in complex traits is  
43 not explained by the additive effects of common single nucleotide polymorphisms (SNPs) across  
44 the genome. POEs may represent an important contribution to this missing heritability  
45 (Guilmatre and Sharp, 2012).

46 There are multiple cited biological mechanisms by which POEs can arise in mammals. These  
47 include maternal intrauterine environment effects and effects of the maternal mitochondrial  
48 genome. However, the most frequently considered mechanism is genomic imprinting  
49 (Rampersaud *et al.*, 2008). This epigenetic phenomenon was formally discovered in the 1980s  
50 primarily through embryological experiments (Reik and Walter, 2001). In imprinting, the  
51 maternal and paternal alleles undergo differential epigenetic modifications that leads to parent-  
52 of-origin-specific transcription of the gene copies. Many imprinted genes tend to be found in  
53 clusters across the genome. Regulation of the expression of these clustered genes is under control  
54 of an imprinting control region (ICR), the mechanisms of which are complex (Barlow, 2011).  
55 These ICR are often characterized by repetitive sequences and located near imprinted genes. It is  
56 estimated that only approximately 1% of mammalian genes are subject to imprinting. However,  
57 there has been growing evidence for the existence of POE variants for a wide range of hereditary  
58 traits (Peters, 2014). Classic examples of POE-associated diseases include Prader-Willi

59 syndrome and Angelman syndrome. These diseases result from imprinted genes at 15q11-15q13  
60 when only maternal or paternal copies are expressed, respectively (Aypar *et al.*, 2014).

61 Considerable research has further suggested POEs originate for a wide spectrum of complex  
62 traits, including obesity-related phenotypes, type 2 diabetes, basal-cell carcinoma, attention-  
63 deficit/hyperactivity disorder, schizophrenia, and breast cancer (Rampersaud *et al.*, 2008;  
64 Giannoukakis *et al.*, 1993; Temple *et al.*, 1995; Huxtable *et al.*, 2000; Polychronakos and  
65 Kukuvtitis, 2002; Hoggart *et al.*, 2014; Dong *et al.*, 2005; Kong *et al.*, 2009; Wang *et al.*, 2012;  
66 Palmer *et al.*, 2006).

67 To detect variants demonstrating POEs, studies have historically required genotype data from  
68 related individuals to ascertain parental ancestry of the inherited alleles. In the case of available  
69 parent-offspring trio or other forms of familial genomes, there are well-established methods to  
70 detect POEs (Connolly and Heron, 2015; Weinberg *et al.*, 1998; Cordell *et al.*, 2004; Howey and  
71 Cordell, 2012; Ainsworth *et al.*, 2011; Sinsheimer *et al.*, 2003; Howey *et al.*, 2015; Becker *et al.*,  
72 2006; Zhou *et al.*, 2012; Weinberg, 1999). These approaches often test for a mean difference in  
73 allele effect based on grouping offspring by parent-of-origin of the allele. These mean-based  
74 tests are intuitive and optimally powered given sample size. Yet, the requirement of trio or more  
75 general family data severely limits this sample size in practice. This, in consequence, limits  
76 genome-wide discovery of the modest genetic effects that we anticipate for complex human  
77 traits.

78 Rather than rely on family studies of limited sample size to detect POEs, researchers have  
79 recently transitioned to detecting the phenomenon in GWAS-scale cohorts. This practice requires  
80 innovative statistical methods to deal with missing parental ancestry information. For example,

81 Kong et al. inferred parental origin of alleles when parental genotype data are not available by  
82 first phasing Icelandic probands. For each of the proband haplotypes, they searched a genealogy  
83 database for the closest typed maternal and paternal relatives carrying that haplotype (Kong *et*  
84 *al.*, 2009). For each haplotype, they constructed a robust score comparing the meiotic distances  
85 between the proband and these two relatives to quantify the likelihood of maternal or paternal  
86 transmission and ultimately assign parental origin. While this approach solves the issue of small  
87 sample sizes, power is still impacted by the potential inaccuracy or uncertainty in haplotypic  
88 reconstruction.

89 More recently, Hoggart et al. described a novel statistical method for detecting POEs for a single  
90 quantitative trait using GWAS data of unrelated individuals (Hoggart *et al.*, 2014). The authors  
91 illustrated that the existence of a POE results in increased phenotypic variance among  
92 heterozygotes compared to homozygotes. They tested for this variance inflation using a robust  
93 version of the Brown-Forsythe test. The method successfully identified previously  
94 undocumented POE associations of two SNPs with body mass index (BMI). This work has  
95 enabled POE analysis in population studies of biobank scale. However, such variance-based tests  
96 are often underpowered compared to their corresponding mean-based tests described above when  
97 allelic parental origin is known (Struchalin *et al.*, 2010). Furthermore, the method only tests for  
98 parent-of-origin-dependent associations between a genetic variant and a single phenotype.

99 A sizable proportion of genes in the GWAS catalog are pleiotropic (Chesmore *et al.*, 2018).  
100 These genes affect more than one biological process, in turn associating with multiple  
101 (correlated) phenotypes (He and Zhang, 2006). Analyzing the joint effects of a gene on more  
102 than one trait can often result in a marked increase in power over univariate approaches

103 (Kocarnik and Fullerton, 2014; Solovieff *et al.*, 2013; O'Reilly *et al.*, 2012). Importantly, well-  
104 established POEs in humans are usually the result of embryonic silencing of one parental allele.  
105 As this silencing generally occurs early in development, its effects are likely to present in all or  
106 nearly all tissues expressing the gene. When differential silencing of this gene affects multiple  
107 tissues, this can yield POEs for several distinct phenotypes. Joint analysis of multiple traits can  
108 leverage this potential pleiotropy to improve power over univariate variance-based POE tests  
109 while simultaneously reducing multiple testing burden of multiple phenotypes.

110 Here, we expand on the concept initially suggested by Hoggart *et al.* to develop a test for POEs  
111 in genetic studies of unrelated individuals that considers multiple quantitative phenotypes. We  
112 show that a pleiotropic POE variant will not only induce differences in the variance of POE traits  
113 between heterozygotes and homozygotes, but also in their corresponding covariances. In our  
114 method, POIROT (Parent-of-Origin Inference using Robust Omnibus Test), we test for equality  
115 of phenotypic covariances matrices between heterozygous and homozygous groups. Specifically,  
116 we use the robust omnibus (R-Omnibus) test (O'Brien, 1992) to accommodate highly skewed  
117 traits. We first provide background on the statistical construction of our test statistic using the R-  
118 Omnibus framework. Next, through simulations, we demonstrate that our proposed method  
119 properly controls type I error and achieves superior power compared to the univariate approach  
120 of Hoggart *et al.* We apply our method to GWAS data of fetal growth phenotypes from the  
121 Hyperglycemia and Adverse Pregnancy Outcome (HAPO) study and identify two potential POE  
122 loci. We conclude with a discussion of our findings and proposed research to extend this work.

## 123 **2 METHODS**

### 124 **2.1 Phenotype Model**

125 Using the notation of Hoggart et al., consider one biallelic SNP with reference allele A and  
 126 alternative allele B (Hoggart *et al.*, 2014). Assume we have collected  $n_{AA}$  individuals who have  
 127 the homozygous AA genotype,  $n_{BB}$  individuals who have the homozygous BB genotype, and  
 128  $n_{AB}$  individuals who are heterozygous. Further assume we have collected  $K > 1$  continuous  
 129 phenotypes on all subjects and that we have already adjusted these phenotypes for the effects of  
 130 non-genetic confounders like principal components of ancestry.

131 We first model phenotypes in homozygous AA subjects. Let  $\mathbf{y}_i^{(AA)} = (y_{i,1}^{(AA)}, y_{i,2}^{(AA)}, \dots, y_{i,K}^{(AA)})' \in$   
 132  $\mathbb{R}^K$  be the vector of phenotypes for the  $i^{\text{th}}$  AA individual. We can represent  $\mathbf{y}_i^{(AA)}$  using the  
 133 following framework

$$\mathbf{y}_i^{(AA)} = \boldsymbol{\mu} + \boldsymbol{\epsilon}_i, i = 1, \dots, n_{AA} \# \quad (1)$$

134 Within (1),  $\boldsymbol{\mu} = (\mu_1, \dots, \mu_K)'$  is the  $K \times 1$  vector of phenotype means in AA subjects and  
 135  $\boldsymbol{\epsilon}_i = (\epsilon_{i1}, \dots, \epsilon_{iK})'$  is the  $K \times 1$  vector of error terms. We assume that  $E[\boldsymbol{\epsilon}_i] = \mathbf{0}_K$  and  $\text{Cov}[\boldsymbol{\epsilon}_i] =$   
 136  $\boldsymbol{\Sigma}$ , where  $\boldsymbol{\Sigma}$  is the  $K \times K$  variance-covariance matrix of the vector of error terms.

137 We next model phenotypes in homozygous BB subjects. Let  $\mathbf{y}_i^{(BB)} = (y_{i,1}^{(BB)}, y_{i,2}^{(BB)}, \dots, y_{i,K}^{(BB)})' \in$   
 138  $\mathbb{R}^K$  be the vector of phenotypes for the  $i^{\text{th}}$  BB individual. Further, let  $\beta_{Mk}$  and  $\beta_{Pk}$  represent the  
 139 effect of the maternally-inherited and paternally-inherited B allele, respectively, on the  $k$ th  
 140 phenotype. If there is no association between this SNP and the  $k$ th phenotype, it follows that  
 141  $\beta_{Mk} = \beta_{Pk} = 0$ . If there is a marginal association between this SNP and the  $k$ th phenotype, but  
 142 there is no POE present, then  $\beta_{Mk} = \beta_{Pk} \neq 0$ . With this notation defined, we can model  $\mathbf{y}_i^{(BB)}$  as

$$\mathbf{y}_i^{(BB)} = \boldsymbol{\mu} + \boldsymbol{\beta}_M + \boldsymbol{\beta}_P + \boldsymbol{\epsilon}_i, i = 1, \dots, n_{BB} \# \quad (2)$$

143 Where  $\boldsymbol{\mu}$  is as defined previously for (1),  $\boldsymbol{\beta}_M = (\beta_{M1}, \dots, \beta_{MK})'$  is the  $K \times 1$  vector of maternal  
 144 effects of the B allele on each of the  $k$  phenotypes, and  $\boldsymbol{\beta}_P = (\beta_{P1}, \dots, \beta_{PK})'$  is the  $K \times 1$  vector  
 145 of corresponding paternal effects of the B allele. Each element of  $\boldsymbol{\beta}_M$  and  $\boldsymbol{\beta}_P$  is assumed to be a  
 146 fixed effect. Just as for the AA subjects in (1), we assume that  $E[\boldsymbol{\epsilon}_i] = \mathbf{0}_K$  and  $\text{Cov}[\boldsymbol{\epsilon}_i] = \boldsymbol{\Sigma}$ .

147 Lastly, we consider heterozygous AB individuals who carry only one copy of the alternative  
 148 allele B. Let  $\mathbf{y}_i^{(AB)} = (y_{i,1}^{(AB)}, y_{i,2}^{(AB)}, \dots, y_{i,K}^{(AB)})' \in \mathbb{R}^K$  be the vector of phenotypes for the  $i$ th  
 149 heterozygote. We can model this vector as

$$\mathbf{y}_i^{(AB)} = \boldsymbol{\mu} + \pi_i \boldsymbol{\beta}_M + (1 - \pi_i) \boldsymbol{\beta}_P + \boldsymbol{\epsilon}_i, i = 1, \dots, n_{AB} \# \quad (3)$$

150 In (3),  $\pi_i$  is an indicator random variable where  $\pi_i = 1$  if individual  $i$  received the B allele from  
 151 the mother and  $\pi_i = 0$  if individual  $i$  received the B allele from the father. We assume  $\pi_i \sim$   
 152 Bernoulli( $1/2$ ), as we expect that half of heterozygotes will have maternally-derived B alleles. The  
 153 maternal and paternal effect vectors are as defined as for the model of BB subjects. We also  
 154 assume that  $E[\boldsymbol{\epsilon}_i] = \mathbf{0}_K$  and  $\text{Cov}[\boldsymbol{\epsilon}_i] = \boldsymbol{\Sigma}$ . In other words, the covariance matrix of the error  
 155 terms is the same within all three genotype groups.

156 Based on the derivations above, we can calculate the phenotype covariance matrix for each  
 157 genotype category. Based on equations (1) and (2), it is straightforward to show that the  
 158 phenotype covariance matrix of AA individuals ( $\boldsymbol{\Sigma}$ ) is the same as the analogous matrix for BB  
 159 individuals. Therefore, we can define  $\boldsymbol{\Sigma}_{Hom} = \boldsymbol{\Sigma}$  as the phenotypic covariance matrix for all  
 160 homozygous subjects. For heterozygous AB subjects modeled in equation (3), we can show that



161 (assuming  $\pi_i \perp \epsilon_i \forall i, i \in (1, \dots, n_{AB})$ ) the phenotype covariance matrix for heterozygotes is  
 162  $\Sigma_{Het} = \frac{1}{4}(\beta_M - \beta_P)(\beta_M - \beta_P)' + \Sigma_{Hom}$ . Defining  $b_k = \beta_{Mk} - \beta_{Pk}$  ( $k = 1, \dots, K$ ), we can  
 163 show that  $\Sigma_{Het} = \Sigma_{Hom}$  if and only if

$$\begin{pmatrix} b_1^2 & b_1 b_2 & \cdots & b_1 b_K \\ b_2 b_1 & b_2^2 & \cdots & b_2 b_K \\ \vdots & \vdots & \ddots & \vdots \\ b_K b_1 & b_K b_2 & \cdots & b_K^2 \end{pmatrix} = \mathbf{0}_{K \times K} \#(4)$$

164 This observation motivates the use of a test of equality of two covariance matrices for detecting  
 165 POEs in a population-based sample where we cannot explicitly observe  $\pi_i$ . If a POE SNP exists  
 166 for any phenotype  $k$ , then  $b_k \neq 0$  and  $b_k^2 > 0$ . Thus, the  $k$ th diagonal element of  $\Sigma_{Het}$  will be  
 167 larger than the corresponding element of  $\Sigma_{Hom}$ . Furthermore, if the SNP has POEs on two  
 168 phenotypes  $k$  and  $k'$ , then  $b_k b_{k'} \neq 0$ . The  $kk'$  element of  $\Sigma_{Het}$  will also be different from the  
 169 corresponding off-diagonal element of  $\Sigma_{Hom}$ .

## 170 2.2 POIROT Method to Detect POE SNPs

171 We can test the null hypothesis that no POEs exist at a given SNP for any of the  $K$  phenotypes  
 172 under study ( $H_0: \beta_M = \beta_P$ ) by equivalently testing  $H_0: \Sigma_{Het} = \Sigma_{Hom}$ . In our proposed method  
 173 POIROT, we test for equality of these phenotypic covariance matrices between homozygotes and  
 174 heterozygotes using the robust omnibus (R-Omnibus) test of O'Brien (O'Brien, 1992). POIROT  
 175 uses R-Omnibus rather than the traditional Box's M test (Box, 1949) to test covariance  
 176 differences since the latter is highly sensitive to deviations of phenotypes from multivariate  
 177 normality. This can lead to a undesirable elevation in type I error rates (Tiku and Balakrishnan,  
 178 1984).

179 To derive the R-Omnibus test, we first center the phenotypes by the median within each  
 180 genotype group (AA, AB, BB). This step is necessary if a marginal association exists between  
 181 the alternative allele and a given phenotype. In that event, the variance of original phenotype  
 182 values among aggregate homozygous subjects (AA, BB) would be erroneously inflated. We next  
 183 group these centered phenotypes by homozygote versus heterozygote status. Let  $x_{i,k}^{het}$  be the  $k$ th  
 184 centered phenotype of the  $i$ th heterozygote ( $i = 1, \dots, n_{AB}$ ) and  $x_{i,k}^{hom}$  be the  $k$ th phenotype of the  
 185  $i$ th homozygous (AA and BB combined) individual ( $i = 1, \dots, n_{AA} + n_{BB}$ ). We then calculate the  
 186 median of each phenotype  $k$  in heterozygotes and homozygotes separately. Let  $M_k^{het}$  be the  
 187 median of the  $k$ th phenotype in the  $n_{AB}$  heterozygotes. Correspondingly, let  $M_k^{hom}$  be the median  
 188 of the  $k$ th phenotype in the  $n_{AA} + n_{BB}$  homozygotes. For heterozygotes and homozygotes  
 189 separately, we then calculate for phenotypes  $k$  and  $k'$ :

$$Z_{i,k,k'}^{het} = (x_{i,k}^{het} - M_k^{het})(x_{i,k'}^{het} - M_{k'}^{het}) \# (5)$$

$$Z_{i,k,k'}^{hom} = (x_{i,k}^{hom} - M_k^{hom})(x_{i,k'}^{hom} - M_{k'}^{hom}) \# (6)$$

$$W_{i,k,k'}^{het} = \frac{Z_{i,k,k'}^{het}}{|Z_{i,k,k'}^{het}|^{\frac{1}{2}}} \# \# (7)$$

$$W_{i,k,k'}^{hom} = \frac{Z_{i,k,k'}^{hom}}{|Z_{i,k,k'}^{hom}|^{\frac{1}{2}}} \# (8)$$

190 In (7) and (8), we standardize the  $Z$  measures by dividing by the square root of their absolute  
 191 values. We consider  $\mathbf{W}_i^{het}$  to be the vector of  $W$  values for the  $i$ th heterozygous subject, and  
 192  $\mathbf{W}_i^{hom}$  is the corresponding vector of  $W$  values for the  $i$ th homozygous subject. We then perform

193 a two-sample Hotelling's  $T^2$  test (Hotelling, 1931) comparing our two sets of  $p = (K^2 + K)/2$   
194 sample means ( $\bar{W}_{het}, \bar{W}_{hom}$ ). There are  $p$  dependent variables being compared between  
195 heterozygotes and homozygotes as this corresponds to the number of upper-triangular elements  
196 in the phenotypic covariance matrix. We calculate the test statistic  $t^2 = \frac{n_{het}n_{hom}}{n_{het}+n_{hom}}(\bar{W}_{het} -$   
197  $\bar{W}_{hom})'S^{-1}(\bar{W}_{het} - \bar{W}_{hom})$ , where  $S^{-1}$  is the inverse of the pooled covariance matrix estimate.  
198 Under the null, our test statistic  $t^2 \sim T^2(p, n_{het} + n_{hom} - 2)$  (Hotelling, 1931). The test can also  
199 be viewed as a one-way multivariate analysis of variance test (MANOVA).

### 200 **2.3 Simulation Study**

201 We conducted a variety of simulation studies to determine POIROT's ability to detect POEs  
202 while maintaining proper rates of type I error. We considered  $K = 3, 6, \text{ or } 10$  phenotypes and  $n =$   
203  $3,000, 5,000, \text{ or } 10,000$  unrelated individuals. To generate phenotypes for each round of  
204 simulation, we first randomly generate  $K$  intercepts from a standard normal distribution to form  
205 the  $K \times 1$  vector  $\mu$ . This corresponds to the mean vector of phenotypes among AA homozygotes.  
206 For simplicity, we assume the diagonal elements of the matrix  $\Sigma$ , corresponding to the variances  
207 of the random error terms, are all equal to one. We assume the  $K$  phenotypes exhibit one of three  
208 possible levels of pairwise correlation (low, medium, or high). We assume the pairwise trait  
209 correlations are randomly drawn from a uniform distribution. To simulate phenotypes exhibiting  
210 "low" correlation, we assume this is a Uniform(0,0.3) distribution. For phenotypes of "medium"  
211 and "high" correlation, we assume a Uniform(0.3,0.5) and Uniform(0.5,0.7) distribution,  
212 respectively. These random draws are used to populate the off-diagonal elements of  $\Sigma$ .

213 Once we have constructed  $\Sigma$ , we then randomly generate  $n$  maternal and paternal genotypes for a  
214 given SNP by sampling twice from a Bernoulli( $p = \text{MAF}$  [minor allele frequency]) for each

215 parent. To generate offspring genotypes, we sample from a Bernoulli( $p = 0.5$ ) distribution to  
216 determine which maternal allele and which paternal allele is transmitted. Thus, we can now  
217 assign all  $n$  offspring to one of four genotype groups: (1) AB with maternal reference/paternal  
218 alternative, (2) AB with paternal reference/maternal alternative, (3) AA, and (4) BB. We then  
219 simulate the phenotypic error vector for all  $n$  unrelated offspring by drawing from a multivariate  
220 distribution with mean 0 and variance-covariance matrix  $\Sigma$ . The respective fixed  $K \times 1$  maternal  
221 and paternal effect vectors of the alternative allele ( $\beta_M, \beta_P$ ) are constructed depending on the  
222 specific null or alternative scenario under consideration. We then add these vectors to the  
223 random error and intercept term in concordance with the genotype group of each individual, as  
224 described in Section 2.1.

225 For type I error rate simulations, as described above, we assume these phenotypes have pairwise-  
226 trait correlation of levels low, medium, or high. To reflect the scenario where there exist no  
227 POEs or marginal effects of the alternative allele at the locus for any phenotype, we assume that  
228  $\beta_M = \beta_P = \mathbf{0}$ . We also considered a second null scenario wherein a marginal association exists  
229 for the variant that is not specific to the parent of origin, i.e.,  $\beta_M = \beta_P \neq \mathbf{0}$ . However, we note  
230 that if the same seeds are used in simulating the data, this marginal fixed effect is effectively  
231 removed when centering phenotypes by genotype group. The resulting test statistics are  
232 equivalent to the first null scenario. We first consider the circumstance where the random error  
233 terms are drawn from a normal distribution, i.e., the error follows  $MVN_K(\mathbf{0}, \Sigma)$  and assume a  
234 MAF of 0.25. For each of the 27 combinations of number of phenotypes, sample size, and  
235 pairwise-trait correlation, we conducted 50,000 null simulations. To evaluate the robustness of  
236 our method to highly skewed phenotypes, we then repeated these parameter settings with non-  
237 normal random error terms. In particular, we utilize the method of Vale and Maurelli to simulate

238 multivariate non-normal error terms assuming a skewness of two and excess kurtosis of two for  
239 each phenotype (Vale and Maurelli, 1983). An example distribution of such a phenotype is  
240 illustrated in Supplemental Figure 1.

241 Next, we investigated the power of our test when POEs do in fact exist for a locus. We again  
242 considered  $K = 3, 6, \text{ or } 10$  normally distributed phenotypes. We assumed 1, 2, or 3 had parent-of-  
243 origin specific associations with the variant. When the number of affected phenotypes is greater  
244 than one, this corresponds to pleiotropy. For these scenarios, we assumed  $\beta_P = \mathbf{0}$  and  $\beta_{Mk} = 0.5,$   
245 0.6, or 0.75 for each phenotype  $k$  harboring a POE. All other elements of the maternal effect  
246 vector are 0 for the phenotypes with no POE associations. We again considered low, medium,  
247 and high pairwise-trait correlations. We assumed a MAF of 0.25 and sample sizes of 5,000, and  
248 10,000. We applied our method to 5,000 simulated datasets for each of the 162 settings and  
249 calculated power at significance level  $\alpha \in \{0.005, 5 \times 10^{-4}\}$ . We also compared the  
250 performance of POIROT to the corresponding univariate test of Hoggart et al. (Hoggart *et al.*,  
251 2014). For the univariate test, we first calculated power using standard Bonferroni correction.  
252 Power was calculated as the proportion of loci for which the minimum observed p-value across  
253 the  $K$  phenotypes tested was less than  $\alpha/K$ . Given that these phenotypes are correlated and  
254 therefore may not reflect  $K$  independent tests, this approach can be overly conservative. Thus, we  
255 implemented a second more liberal approach that estimates the true number of independent tests,  
256  $K_{eff}$ , which corresponds to the minimum number of principal components (PCs) explaining 90%  
257 of the variation in our  $K$  phenotypes. We then calculated power of the univariate approach as the  
258 proportion of loci for which the minimum observed p-value was less than  $\alpha/K_{eff}$  (Gao *et al.*,  
259 2008; Broadaway *et al.*, 2016). We then repeated these parameter settings for assessing power of  
260 POIROT with non-normal phenotypes, as described for null simulations.

## 261 **2.4 Application of POIROT to HAPO Study**

262 Moore and Haig hypothesized that genomic imprinting is a result of the opposing interests of the  
263 maternal and paternal genomes on fetal development (Moore and Haig, 1991). In particular, the  
264 paternal genes favor greater nutrient transfer from mother to embryo to make offspring larger  
265 and thus more likely to survive. However, larger offspring represent a greater challenge to the  
266 mother in terms of the ability of the offspring to safely fit through the birth canal and a potential  
267 threat to future reproductive success. This can lead maternal genes to favor a more modest  
268 nutrient transfer to the embryo. Based on this evolutionary theory, anthropomorphic phenotypes  
269 at birth like total weight or head circumference carry high potential to be imprinted and are likely  
270 candidates for potential POEs. Therefore, to assess the utility of POIROT for detecting POEs on  
271 continuous phenotypes using published population-based GWAS data, we utilized genotype and  
272 phenotype data from the Hyperglycemia and Adverse Pregnancy Outcome Study (HAPO Study  
273 Cooperative Research Group, 2009; HAPO Study Cooperative Research Group *et al.*, 2008,  
274 2006; HAPO Study Cooperative Research Group, 2002). This study explored genetic variation  
275 associated with offspring size measures at birth, maternal glucose tolerance indicators, and the  
276 interaction of maternal/fetal genetic and environmental factors on these phenotypes using paired  
277 maternal and offspring DNA.

278 Through dbGaP (accession number phs000096.v4.p1), we obtained data on six quantitative  
279 phenotypes related to infant size at birth (birth weight, birth length, head circumference, flank  
280 skinfold thickness, subscapular skinfold thickness, triceps skinfold thickness). Relevant  
281 covariates included PCs, infant sex, gestational age at birth, maternal pre-pregnancy BMI, and  
282 maternal smoking status during pregnancy (none, 1-10 per day, >10 per day). While this is a

283 multi-ethnic study, we restricted our analysis to infants of European ancestry. Subjects were  
284 genotyped using the Illumina Human610 Quad BeadChip. Prior to lift over and imputation, we  
285 excluded infants with genotype missingness greater than 10%, variants with missingness greater  
286 than 2%, variants with  $MAF < 0.005$ , and variants with Hardy-Weinberg Equilibrium  $p < 1e-8$ .  
287 We then lifted over genotype array data to hg38 and followed the pre-imputation quality control  
288 pipeline provided at <https://www.well.ox.ac.uk/~wrayner/tools/#Checking>. We performed  
289 imputation using the TOPMed Imputation Server (reference panel TOPMed Freeze 5) (Taliun *et*  
290 *al.*, 2021; Das *et al.*, 2016; Fuchsberger *et al.*, 2015). We kept only those variants with  $Rsq$   
291  $\geq 0.3$ . After quality control and imputation, 6,219,272 SNPs with  $MAF > 0.05$  remained for  
292 analysis across 1,289 unrelated infants. All mothers indicated no illicit drug use during  
293 pregnancy. Covariate adjustment was performed by first fitting a linear model for each  
294 phenotype and extracting the residuals as the new adjusted phenotypes. We then applied  
295 POIROT to these six adjusted phenotypes to jointly test for POEs across the genome. We  
296 compared the findings of our approach to those from the method of Hoggart *et al.* performed on  
297 each phenotype individually.

## 298 **3 RESULTS**

### 299 **3.1 Type I Error Rate**

300 We summarize the type I error of null scenarios with a sample size of 5,000 individuals using  
301 Quantile-Quantile (QQ) plots in Figure 1 (normal traits) and Figure 2 (non-normal traits). Across  
302 the settings considered, our method yields the expected distribution of  $p$ -values under the null  
303 hypothesis of no POEs for any single phenotype. The distribution of the  $p$ -values is again as  
304 expected under the null when we have non-normality of phenotypes (Figure 2), suggesting our

305 method remains robust. We summarize the empirical type I error rates of our proposed test and  
306 the competing univariate approach at significance level  $\alpha \in \{0.05, 0.005, 5 \times 10^{-4}, 5 \times 10^{-5}\}$  in  
307 Supplemental Table 1. POIROT maintained appropriate type I error across all scenarios for  
308 normally distributed traits. We observed slightly higher error when 6 or 10 highly-skewed non-  
309 normal phenotypes were tested. The univariate approach with correction for  $K_{eff}$  tests showed  
310 minor inflation with 6 or 10 highly correlated phenotypes.

### 311 **3.2 Power**

312 Simulation results comparing the performance of POIROT to the competing univariate test under  
313 the assumption of true POE(s) are summarized in Figure 3. This figure reflects normally  
314 distributed traits and sample size of 5,000 ( $\alpha = 5 \times 10^{-4}$ ). Corresponding results from all other  
315 additional power settings, including both normal and non-normal traits, sample sizes of 5,000  
316 and 10,000, and  $\alpha = 0.005, 5 \times 10^{-4}$  are provided in Supplemental Figures 2-9.

317 Simple Bonferroni correction tends to be overly conservative in the presence of correlated traits.  
318 We therefore used two multiple-testing correction approaches for the univariate method. As  
319 power generally increases with increasing sample size and POE magnitude, the scenarios shown  
320 in Figure 3 correspond to a  $\beta_{Mk}$  of 0.75 and sample size of 5,000. For almost all scenarios, we see  
321 three general trends. First, unlike the univariate method, our method successfully leverages the  
322 correlation among phenotypes. We see power increasing with increasing trait correlation.  
323 Second, when pleiotropy exists and more than one phenotype harbors a POE, our method  
324 outperforms the univariate approach regardless of the multiple testing correction strategy. Third,  
325 power of POIROT increases as the number of phenotypes associated with the maternally-  
326 transmitted alternative allele increases across all levels of phenotypic correlation.



327 The one exception to these trends is the top right panel of Figure 3. This reflects the scenario  
328 where 3 of 3 phenotypes harbor POEs of the same magnitude and direction. We see here that  
329 power decreases going from low to medium correlation and from medium to high correlation.  
330 We also see lower power when 3 phenotypes are affected when compared to the corresponding  
331 settings when only 2 of 3 phenotypes have POEs. This pattern, although unusual, has been  
332 documented in previous cross-phenotype methodological studies (Ray *et al.*, 2016; Broadaway *et*  
333 *al.*, 2016). As described in Section 2.2, the R-Omnibus test for equality of covariance matrices  
334 used by POIROT ultimately employs a one-way MANOVA test to generate our test statistic. Ray  
335 *et al.* describe how when we have  $K$  correlated traits being tested and a SNP is associated with all  
336  $K$  traits, utilizing a MANOVA to find marginal associations with multiple traits can result in an  
337 appreciable loss of power. In particular, the authors show how the power of MANOVA is  
338 asymptotically lower when all traits are associated with equal magnitude and direction than when  
339 fewer than  $K$  phenotypes are associated (Ray *et al.*, 2016).

### 340 **3.3 Applied Data Analysis**

341 We applied our method for detecting POEs to genotype and multivariate phenotype data of 1,289  
342 unrelated infants of European ancestry from the Hyperglycemia and Adverse Pregnancy  
343 Outcome (HAPO) Study. Raw phenotype measures were quantitative anthropometric measures  
344 related to infant size at birth (birth weight, length, head circumference, and three skinfold  
345 measurements). Phenotypes were appropriately adjusted for the effects of the first two PCs,  
346 infant sex, gestational age at birth, maternal BMI, and maternal smoking frequency. For the  
347 6,219,272 variants considered, the average computation time per test was 0.58 seconds. Analysis  
348 was run with parallel computation, and time per chromosome ranged between 8.4 and 117.3

349 hours (median 39.0 hours). In short, although we did not see any variants falling below the  
350 Bonferroni-adjusted genome-wide significance threshold of  $5 \times 10^{-8}$ , we saw one SNP with near  
351 genome-wide significance (rs1496904, POIROT  $p = 9.58 \times 10^{-8}$ ). This SNP is 138kb from the  
352 transcription start site of gene *SEMA6D*. Common polymorphisms in this gene have previously  
353 been associated with arm fat mass, leg fat mass, body fat percentage, height, and other adult-  
354 correlates of traits similar to those we tested in the HAPO study infants  
355 (<http://www.nealelab.is/uk-biobank/>, Ochoa *et al.*, 2021; Kichaev *et al.*, 2019)). Thirteen other  
356 variants at this locus (chr15:47321206-47355147) similarly had POIROT p-values below  $5 \times$   
357  $10^{-7}$ . As we see in the Manhattan plot of Figure 4b, there is another locus of suggestive  
358 significance on chromosome 1 (chr1:154328785-154347720) with six variants whose p-values  
359 fall below  $5 \times 10^{-7}$ . The lead SNP is rs141140594 (POIROT  $p = 2.43 \times 10^{-7}$ ). This SNP lies 3kb  
360 from gene *ATP8B2*. Nearby variants have previously been associated with type 2 diabetes.  
361 However, the mechanisms by which this gene is functionally implicated in the disease remain  
362 unclear (Imamura *et al.*, 2016; M *et al.*, 2020). Furthermore, these loci were not identified by the  
363 univariate approach across the six tests for each phenotype (minimum  $p = 5.42 \times 10^{-5}$ ).

#### 364 **4 DISCUSSION**

365 In this paper, we introduce a multivariate method, POIROT, for identifying common variants  
366 exhibiting POEs on one or more quantitative phenotypes in unrelated subjects. This work is  
367 motivated dually by the widespread evidence of pleiotropy in the genetics literature, as well as  
368 the limited statistical options for detecting POEs in unrelated cohorts. Our proposed method is an  
369 inherently simple statistical test of whether the phenotypic covariance matrix of heterozygotes is  
370 equal to that of homozygotes at a given locus. It represents a multivariate extension of the POE

371 test of a single continuous phenotype proposed by Hoggart et al. (Hoggart *et al.*, 2014). It allows  
372 for appropriate adjustment for the effects of important covariates on the phenotypes under study  
373 and is also computationally efficient for application to biobank-scale datasets (Supplemental  
374 Tables 2-3). The R code for implementing POIROT is publicly available (see Data Availability).

375 Through simulations, we demonstrate POIROT achieves appropriate type I error under the null.  
376 It further displays superior power to detect POEs than the competing univariate approach under  
377 most settings. Our method is indeed robust to non-normality of phenotypes across several  
378 simulation scenarios. We further applied our method to real GWAS data on unrelated infants  
379 from the HAPO Study. In this analysis, we considered six anthropometric measurements at birth  
380 related to fetal growth. Although the analysis presented here did not reveal any variants meeting  
381 the stringent genome-wide significance threshold, two loci of suggestive significance were  
382 identified that may warrant further investigation. These loci are not located within 500kb of any  
383 known imprinting gene in humans. They may, however, be strong candidates for follow-up  
384 replication analyses using independent trio studies or other familial studies of these phenotypes.

385 The top locus has been shown in prior studies to be associated directly with similar adult  
386 anthropometric measures. Further, the second has documented associations with type 2 diabetes,  
387 a condition of the metabolic syndrome. The Barker hypothesis posits that inadequate fetal  
388 nutrition, quantitative measures of which include birth weight, confers greater risk of metabolic  
389 syndrome later in life (Edwards, 2017). We also note that these loci were not identified by the  
390 competing univariate approach. This suggests that joint consideration of multiple related traits  
391 can indeed help improve discovery of POE variants. We do note that such discovery potential is  
392 limited in the HAPO dataset due to sample size (N=1,289). This dataset is small compared to

393 many modern consortium GWAS and is vastly unpowered to detect even marginal effects of  
394 SNPs affecting body size or type 2 diabetes (Xue *et al.*, 2018; Berndt *et al.*, 2013). In our  
395 simulations, we show significant power in sample sizes 5-10 times larger than that of the HAPO  
396 analysis. That any plausible suggestive results are observed by our method in this dataset, we  
397 take as a promising sign for future work.

398 There are several avenues we are interested in pursuing to extend the work presented here.  
399 Rather than testing genome-wide variants, implementation of a two-stage screening procedure  
400 may mitigate the multiple testing burden. In the first stage, we propose to perform a standard  
401 GWAS for marginal (not parent-of-origin dependent) variant associations that considers multiple  
402 traits jointly. We restrict consideration to marginal association tests that are orthogonal to  
403 POIROT and thus provide complementary information. We can then efficiently test a smaller  
404 subset of top SNPs identified from the first stage for POEs. Another limitation we acknowledge  
405 is the requirement of continuous phenotypes. We are interested in the possible extension of our  
406 approach to accommodate dichotomous multivariate traits. One potential solution would be to  
407 use liability-threshold models (Hujoel *et al.*, 2020) that can effectively transform a binary  
408 outcome into a continuous-valued posterior mean genetic liability.

## 409 **ACKNOWLEDGEMENTS**

410 The data used for the applied analysis described in this paper were downloaded from the  
411 database of Genotypes and Phenotypes (dbGaP, <http://www.ncbi.nlm.nih.gov/gap>) with study  
412 accession phs000096.v4.p1. The Hyperglycemia and Adverse Pregnancy Outcome (HAPO)  
413 Study was a part of the Gene Environment Association (GENEVA) studies, and we acknowledge

414 the principal investigator William L. Lowe, all co-investigators, the National Human Genome  
415 Research Institute (NHGRI), and NIH grant U01 HG004415.

416 **Funding:** This work was supported by the National Institutes of Health [AG071170, DE029698,  
417 CA211574].

418 *Conflict of Interest:* none declared.

419 **Data availability:** The code for implementing this method in R is publicly available at  
420 <https://github.com/staylorhead/POIROT-POE>.

421

422 **FIGURES**

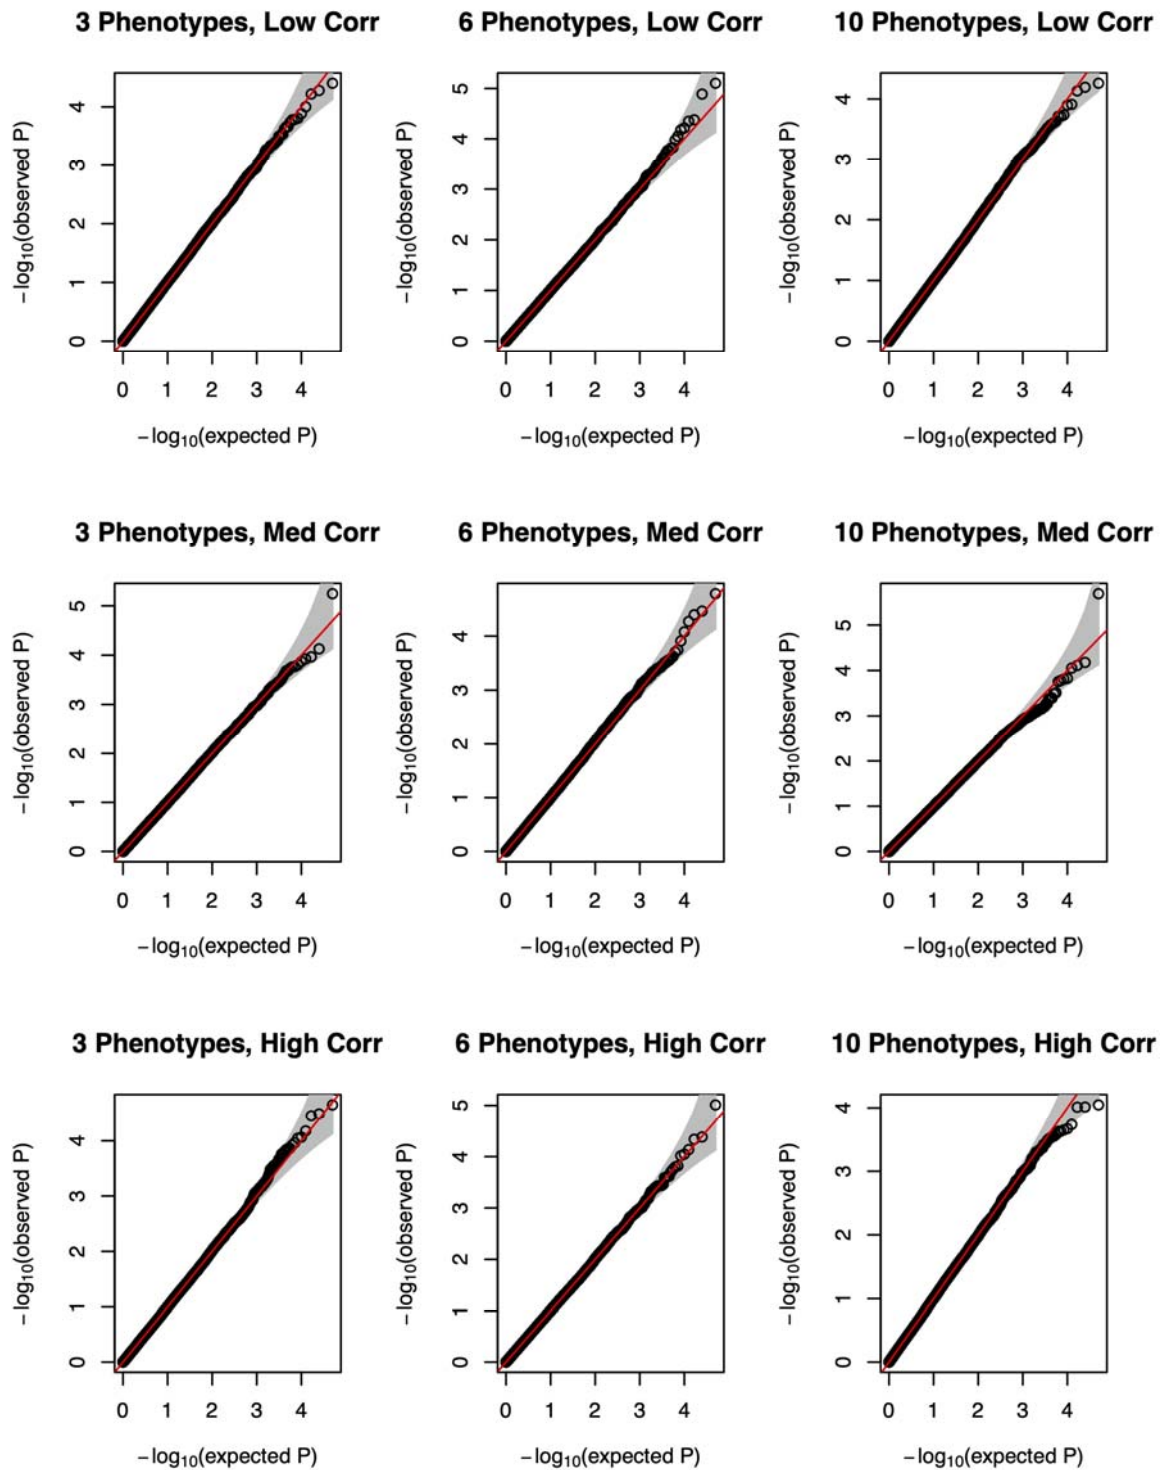

423

424 **Figure 1.** QQ plots of p-values for proposed parent-of-origin effect test under the null hypothesis

425  $\beta_M = \beta_P = \mathbf{0}$  using a series of 50,000 simulations of 5,000 individuals using 3 (left column), 6  
426 (middle column) or 10 (right column) continuous normal phenotypes. MAF is assumed to be  
427 0.25. Horizontal panels depict level of pairwise-trait correlation (low, medium, high).  
428 Abbreviations: QQ, quantile-quantile; MAF, minor allele frequency.

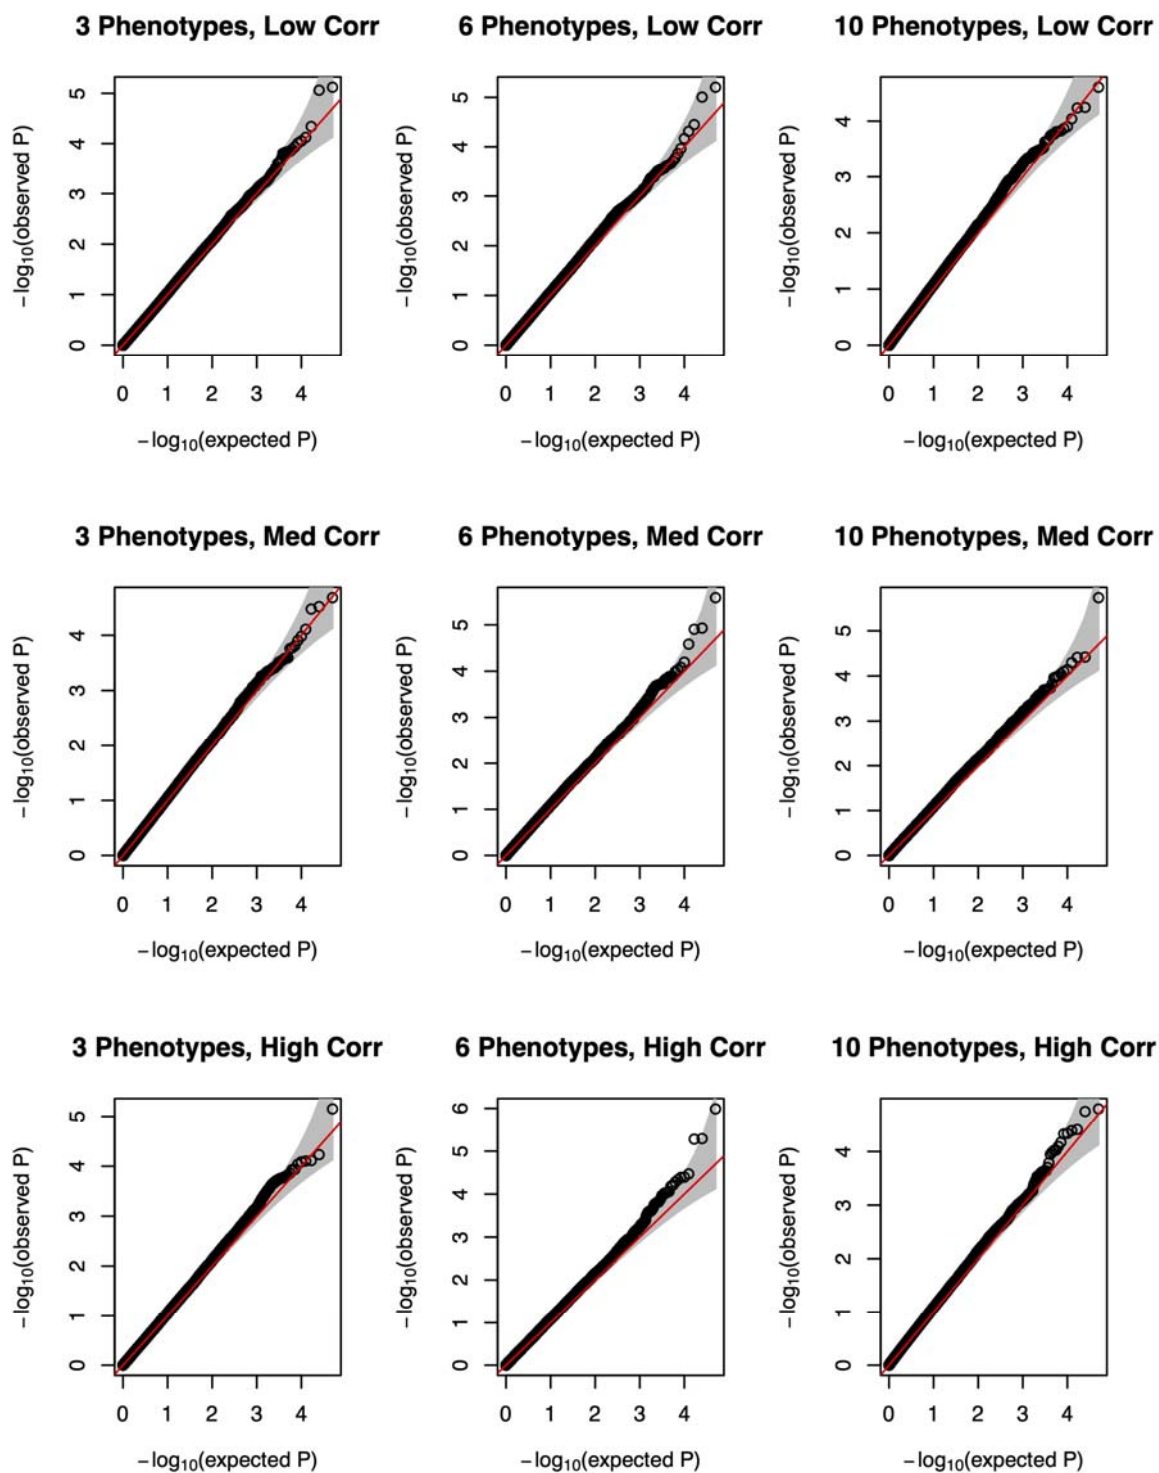

429  
430 **Figure 2.** QQ plots of p-values for proposed parent-of-origin effect test under the null hypothesis  
431 using a series of 50,000 simulations of 5,000 individuals using 3 (left column), 6



432 (middle column) or 10 (right column) continuous non-normal phenotypes. MAF is assumed to be  
433 0.25. Horizontal panels depict level of pairwise-trait correlation (low, medium, high).  
434 Abbreviations: QQ, quantile-quantile; MAF, minor allele frequency.

435

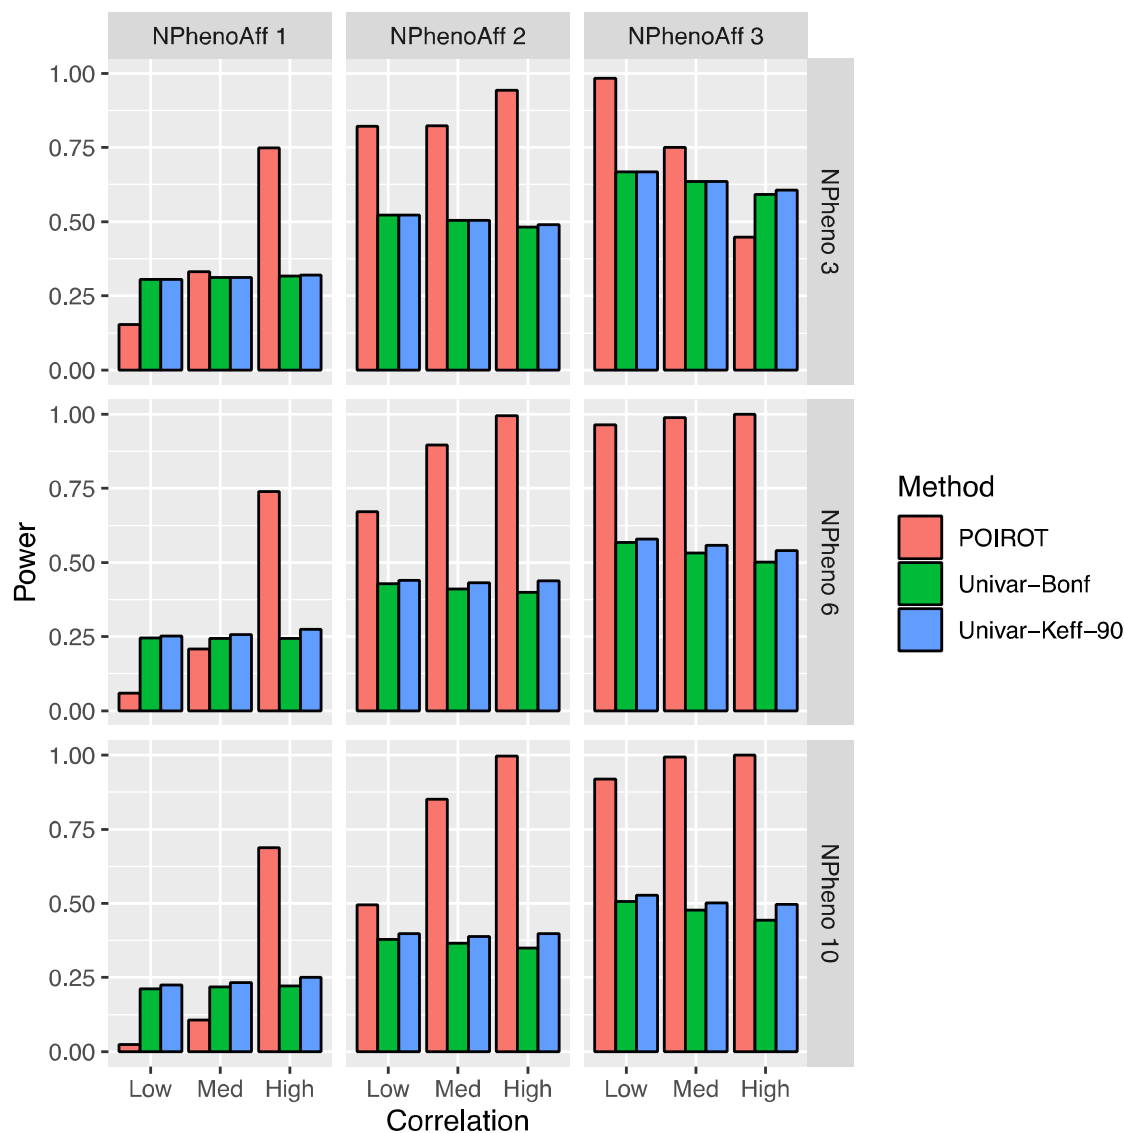

436

437 **Figure 3.** Power of POIROT to identify POEs assuming  $K = 3, 6,$  or  $10$  normal phenotypes  
438 (horizontal panels) compared to univariate test. We assume either 1, 2, or 3 of the phenotypes

439 harbor POEs at the locus (vertical panels). We performed 5,000 simulations for each scenario.  
440 We calculated power at significance level 0.0005 for our multi-trait test and  $0.0005/K$   
441 (Bonferroni correction) and  $0.0005/K_{eff}$  for the univariate test, where  $K_{eff}$  is the number of PCs  
442 needed to explain 90% phenotypic variation. for POE traits, MAF = 0.25, and  
443 sample size = 5,000. Abbreviations: POE, parent-of-origin effect; MAF, minor allele frequency;  
444 PCs, principal components.

445

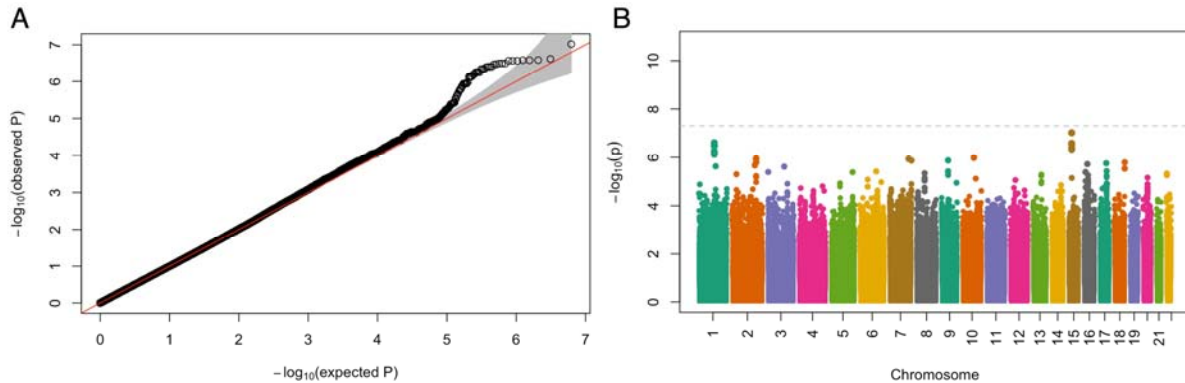

446

447 **Figure 4.** A) QQ plot from parent-of-origin effects analysis using POIROT and six HAPO study  
448 phenotypes related to infant size at birth. B) Manhattan plot of corresponding analysis where  
449 dashed line represents genome-wide significance of . Abbreviations: QQ, quantile-  
450 quantile.

451

## 452 REFERENCES

- 453 Ainsworth,H.F. *et al.* (2011) Investigation of maternal effects, maternal-fetal interactions and  
454 parent-of-origin effects (imprinting), using mothers and their offspring. *Genet.*  
455 *Epidemiol.*, **35**, 19–45.
- 456 Aypar,U. *et al.* (2014) Does parent of origin matter? Methylation studies should be performed on  
457 patients with multiple copies of the Prader–Willi/Angelman syndrome critical region.  
458 *Am. J. Med. Genet. A.*, **164**, 2514–2520.
- 459 Barlow,D.P. (2011) Genomic imprinting: a mammalian epigenetic discovery model. *Annu. Rev.*  
460 *Genet.*, **45**, 379–403.
- 461 Becker,T. *et al.* (2006) Detection of parent-of-origin effects in nuclear families using haplotype  
462 analysis. *Hum. Hered.*, **62**, 64–76.
- 463 Berndt,S.I. *et al.* (2013) Genome-wide meta-analysis identifies 11 new loci for anthropometric  
464 traits and provides insights into genetic architecture. *Nat. Genet.*, **45**, 501–512.
- 465 Box,G.E.P. (1949) A General Distribution Theory for a Class of Likelihood Criteria. *Biometrika*,  
466 **36**, 317–346.
- 467 Broadaway,K.A. *et al.* (2016) A Statistical Approach for Testing Cross-Phenotype Effects of  
468 Rare Variants. *Am. J. Hum. Genet.*, **98**, 525–540.
- 469 Chesmore,K. *et al.* (2018) The ubiquity of pleiotropy in human disease. *Hum. Genet.*, **137**, 39–  
470 44.
- 471 Connolly,S. and Heron,E.A. (2015) Review of statistical methodologies for the detection of  
472 parent-of-origin effects in family trio genome-wide association data with binary disease  
473 traits. *Brief. Bioinform.*, **16**, 429–448.
- 474 Cordell,H.J. *et al.* (2004) Case/pseudocontrol analysis in genetic association studies: A unified  
475 framework for detection of genotype and haplotype associations, gene-gene and gene-  
476 environment interactions, and parent-of-origin effects. *Genet. Epidemiol.*, **26**, 167–185.
- 477 Das,S. *et al.* (2016) Next-generation genotype imputation service and methods. *Nat. Genet.*, **48**,  
478 1284–1287.
- 479 Dong,C. *et al.* (2005) Possible Genomic Imprinting of Three Human Obesity–Related Genetic  
480 Loci. *Am. J. Hum. Genet.*, **76**, 427–437.
- 481 Edwards,M. (2017) The Barker Hypothesis. In, Preedy,V. and Patel,V.B. (eds), *Handbook of*  
482 *Famine, Starvation, and Nutrient Deprivation: From Biology to Policy*. Springer  
483 International Publishing, Cham, pp. 1–21.
- 484 Fuchsberger,C. *et al.* (2015) minimac2: faster genotype imputation. *Bioinformatics*, **31**, 782–784.
- 485 Gao,X. *et al.* (2008) A multiple testing correction method for genetic association studies using  
486 correlated single nucleotide polymorphisms. *Genet. Epidemiol.*, **32**, 361–369.
- 487 Giannoukakis,N. *et al.* (1993) Parental genomic imprinting of the human IGF2 gene. *Nat. Genet.*,  
488 **4**, 98–101.
- 489 Guilmatre,A. and Sharp,A. (2012) Parent of origin effects. *Clin. Genet.*, **81**, 201–209.
- 490 HAPO Study Cooperative Research Group (2009) Hyperglycemia and Adverse Pregnancy  
491 Outcome (HAPO) Study: associations with neonatal anthropometrics. *Diabetes*, **58**, 453–  
492 459.
- 493 HAPO Study Cooperative Research Group *et al.* (2008) Hyperglycemia and adverse pregnancy  
494 outcomes. *N. Engl. J. Med.*, **358**, 1991–2002.

- 495 HAPO Study Cooperative Research Group *et al.* (2006) Integration of local and central  
496 laboratory functions in a worldwide multicentre study: Experience from the  
497 Hyperglycemia and Adverse Pregnancy Outcome (HAPO) Study. *Clin. Trials Lond.*  
498 *Engl.*, **3**, 397–407.
- 499 HAPO Study Cooperative Research Group (2002) The Hyperglycemia and Adverse Pregnancy  
500 Outcome (HAPO) Study. *Int. J. Gynaecol. Obstet. Off. Organ Int. Fed. Gynaecol.*  
501 *Obstet.*, **78**, 69–77.
- 502 He,X. and Zhang,J. (2006) Toward a molecular understanding of pleiotropy. *Genetics*, **173**,  
503 1885–1891.
- 504 Hoggart,C.J. *et al.* (2014) Novel Approach Identifies SNPs in SLC2A10 and KCNK9 with  
505 Evidence for Parent-of-Origin Effect on Body Mass Index. *PLOS Genet.*, **10**, e1004508.
- 506 Hotelling,H. (1931) The Generalization of Student’s Ratio. *Ann. Math. Stat.*, **2**, 360–378.
- 507 Howey,R. *et al.* (2015) Increased Power for Detection of Parent-of-Origin Effects via the Use of  
508 Haplotype Estimation. *Am. J. Hum. Genet.*, **97**, 419–434.
- 509 Howey,R. and Cordell,H.J. (2012) PREMIM and EMIM: tools for estimation of maternal,  
510 imprinting and interaction effects using multinomial modelling. *BMC Bioinformatics*, **13**,  
511 149.
- 512 Hujoel,M.L.A. *et al.* (2020) Liability threshold modeling of case–control status and family  
513 history of disease increases association power. *Nat. Genet.*, **52**, 541–547.
- 514 Huxtable,S.J. *et al.* (2000) Analysis of parent-offspring trios provides evidence for linkage and  
515 association between the insulin gene and type 2 diabetes mediated exclusively through  
516 paternally transmitted class III variable number tandem repeat alleles. *Diabetes*, **49**, 126–  
517 130.
- 518 Imamura,M. *et al.* (2016) Genome-wide association studies in the Japanese population identify  
519 seven novel loci for type 2 diabetes. *Nat. Commun.*, **7**, 10531.
- 520 Kichaev,G. *et al.* (2019) Leveraging Polygenic Functional Enrichment to Improve GWAS  
521 Power. *Am. J. Hum. Genet.*, **104**, 65–75.
- 522 Kocarnik,J.M. and Fullerton,S.M. (2014) Returning pleiotropic results from genetic testing to  
523 patients and research participants. *JAMA*, **311**, 795–796.
- 524 Kong,A. *et al.* (2009) Parental origin of sequence variants associated with complex diseases.  
525 *Nature*, **462**, 868–874.
- 526 Lawson,H.A. *et al.* (2013) Genomic imprinting and parent-of-origin effects on complex traits.  
527 *Nat. Rev. Genet.*, **14**, 609–617.
- 528 M,V. *et al.* (2020) Discovery of 318 new risk loci for type 2 diabetes and related vascular  
529 outcomes among 1.4 million participants in a multi-ancestry meta-analysis. *Nat. Genet.*,  
530 **52**, 680–691.
- 531 Moore,T. and Haig,D. (1991) Genomic imprinting in mammalian development: a parental tug-  
532 of-war. *Trends Genet.*, **7**, 45–49.
- 533 O’Brien,P.C. (1992) Robust Procedures for Testing Equality of Covariance Matrices. *Biometrics*,  
534 **48**, 819–827.
- 535 Ochoa,D. *et al.* (2021) Open Targets Platform: supporting systematic drug–target identification  
536 and prioritisation. *Nucleic Acids Res.*, **49**, D1302–D1310.
- 537 O’Reilly,P.F. *et al.* (2012) MultiPhen: Joint Model of Multiple Phenotypes Can Increase  
538 Discovery in GWAS. *PLOS ONE*, **7**, e34861.
- 539 Palmer,C.G.S. *et al.* (2006) HLA-B Maternal-Fetal Genotype Matching Increases Risk of  
540 Schizophrenia. *Am. J. Hum. Genet.*, **79**, 710–715.

- 541 Peters,J. (2014) The role of genomic imprinting in biology and disease: an expanding view. *Nat.*  
542 *Rev. Genet.*, **15**, 517–530.
- 543 Polychronakos,C. and Kukuvtis,A. (2002) Parental genomic imprinting in endocrinopathies.  
544 *Eur. J. Endocrinol.*, **147**, 561–569.
- 545 Rampersaud,E. *et al.* (2008) Investigating parent of origin effects in studies of Type 2 Diabetes  
546 and Obesity. *Curr. Diabetes Rev.*, **4**, 329–339.
- 547 Ray,D. *et al.* (2016) USAT: A Unified Score-Based Association Test for Multiple Phenotype-  
548 Genotype Analysis. *Genet. Epidemiol.*, **40**, 20–34.
- 549 Reik,W. and Walter,J. (2001) Genomic imprinting: parental influence on the genome. *Nat. Rev.*  
550 *Genet.*, **2**, 21–32.
- 551 Sinsheimer,J.S. *et al.* (2003) Detecting genotype combinations that increase risk for disease:  
552 maternal-fetal genotype incompatibility test. *Genet. Epidemiol.*, **24**, 1–13.
- 553 Solovieff,N. *et al.* (2013) Pleiotropy in complex traits: challenges and strategies. *Nat. Rev.*  
554 *Genet.*, **14**, 483–495.
- 555 Struchalin,M.V. *et al.* (2010) Variance heterogeneity analysis for detection of potentially  
556 interacting genetic loci: method and its limitations. *BMC Genet.*, **11**, 92.
- 557 Taliun,D. *et al.* (2021) Sequencing of 53,831 diverse genomes from the NHLBI TOPMed  
558 Program. *Nature*, **590**, 290–299.
- 559 Temple,I.K. *et al.* (1995) An imprinted gene(s) for diabetes? *Nat. Genet.*, **9**, 110–112.
- 560 Tiku,M.L. and Balakrishnan,N. (1984) Testing equality of population variances the robust way.  
561 *Commun. Stat. - Theory Methods*, **13**, 2143–2159.
- 562 Vale,C.D. and Maurelli,V.A. (1983) Simulating multivariate nonnormal distributions.  
563 *Psychometrika*, **48**, 465–471.
- 564 Wang,K.-S. *et al.* (2012) Parent-of-origin effects of FAS and PDLIM1 in attention-  
565 deficit/hyperactivity disorder. *J. Psychiatry Neurosci.*, **37**, 46–52.
- 566 Weinberg,C.R. *et al.* (1998) A Log-Linear Approach to Case-Parent–Triad Data: Assessing  
567 Effects of Disease Genes That Act Either Directly or through Maternal Effects and That  
568 May Be Subject to Parental Imprinting. *Am. J. Hum. Genet.*, **62**, 969–978.
- 569 Weinberg,C.R. (1999) Methods for detection of parent-of-origin effects in genetic studies of  
570 case-parents triads. *Am. J. Hum. Genet.*, **65**, 229–235.
- 571 Xue,A. *et al.* (2018) Genome-wide association analyses identify 143 risk variants and putative  
572 regulatory mechanisms for type 2 diabetes. *Nat. Commun.*, **9**, 2941.
- 573 Zhou,J.-Y. *et al.* (2012) A powerful parent-of-origin effects test for qualitative traits  
574 incorporating control children in nuclear families. *J. Hum. Genet.*, **57**, 500–507.

575
